# Supplementary material for: Quantum confinement dominates band gaps while defects lead the photoluminescence in silicon nanowires
Source: Royal Society of Chemistry journal article supplement (doi:10.1039/d6ra01273f), 2026-05-18
Supplement: d6ra01273f1.pdf [file d6ra01273f1.pdf]

## Supplementary Material

### Quantum Confinement Dominates Band Gaps, while Defects Lead the Photoluminescence in Silicon Nanowires

Aarti Diwan<sup>1</sup>, Tharun J<sup>1</sup>, Chandeeep EC<sup>1</sup>, Anand Mohan Shrivastav<sup>1</sup>, Tulika Srivastava<sup>2\*</sup>, Rajesh Kumar<sup>3</sup> and Shailendra K. Saxena<sup>1\*</sup>

<sup>1</sup>Optics and Nanoelectronics Laboratory (ONE), Department of Physics and Nanotechnology, College of Engineering and Technology, SRM Institute of Science and Technology, Kattankulathur, Tamil Nadu, India, 603203

<sup>2</sup>Department of Electronics & Communication, College of Engineering and Technology, SRM Institute of Science and Technology, Kattankulathur, Chennai 603203, India

<sup>3</sup>Materials and Device Laboratory, Department of Physics, Indian Institute of Technology Indore, Simrol, India 453552

\*Corresponding author(s) e-mail: [tulikas@srmist.edu.in](mailto:tulikas@srmist.edu.in), [shailens@srmist.edu.in](mailto:shailens@srmist.edu.in)

## 1. SEM image of silicon nanowires (SiNWs) in cross sectional view

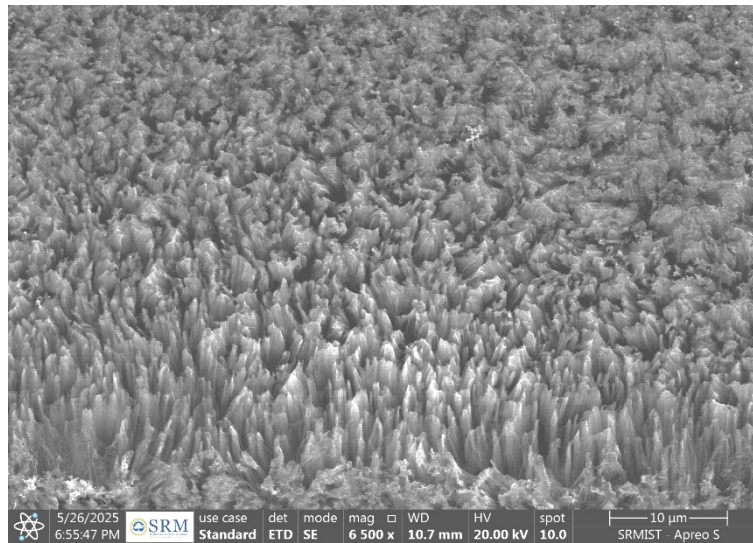

Figure 1. SEM image of cross- sectional view of silicon nanowires (SiNWs) for 30 minutes etching.

## 2. Examples of higher Urbach energies.

| Material                                                                                                                                                   | Urbach energy ( $E_0$ )            | References |
|------------------------------------------------------------------------------------------------------------------------------------------------------------|------------------------------------|------------|
| Zinc oxide (ZnO)                                                                                                                                           | 400 to 1000 meV                    | 1          |
| Tin oxide ( $\text{SnO}_2$ )                                                                                                                               | 1,666 meV, 945 meV, and 12,210 meV | 2          |
| Erbium oxide ( $\text{Er}_2\text{O}_3$ )                                                                                                                   | 0.722 to 1.083 eV                  | 3          |
| Copper-doped hematite (Cu- $\text{Fe}_2\text{O}_3$ )                                                                                                       | 1100 meV                           | 4          |
| mercuric-sodium-lead-borate glasses<br>(55-x) $\text{B}_2\text{O}_3 \cdot 10\text{SrF}_2 \cdot 25\text{PbO} \cdot 10\text{Na}_2\text{O} \cdot x\text{HgO}$ | 0.74 to 1.54 eV                    | 5          |
| Poly (3, 4-ethylenedioxythiophene)                                                                                                                         | 2197 to 2262 meV                   | 6          |
| Cadmium oxide (CdO)                                                                                                                                        | 715 to 826 meV                     | 7          |
| Phenylene thiophene based polyazomethines (PTPI)                                                                                                           | 1670 meV                           | 8          |

### References

1 D. Scolfaro, Y. J. Onofre, M. D. Teodoro and M. P. F. de Godoy, *International Journal of Photoenergy*, 2018, **2018**, 8607247.

- 2F. Omoniyi, I. Omoteji and T. Imalero, 2026, **17**, 424–434.
- 3A. S. Abouhaswa, U. Periřanođlu, S. Saltık, N. Ekinci, M. H. Nasr, S. Kalecik and E. K. Periřanođlu, *J Inorg Organomet Polym*, 2025, **35**, 4865–4883.
- 4A. Y. Fasasi, E. Ajenifuja, E. Osagie, L. Animashaun, A. Adeoye and E. Obiajunwa, *Journal of the Nigerian Society of Physical Sciences*, 2023, 1180–1180.
- 5Y. S. Rammah, A. T. Shah, O. Görke, N. V. Kudrevatykh and A. S. Abouhaswa, *Materials Research Bulletin*, 2023, **160**, 112136.
- 6R. Ahmed, *Arab Journal of Nuclear Sciences and Applications*, DOI:10.21608/ajnsa.2018.2326.1024.
- 7K. Haneen and D. Latif, *International Journal of ChemTech Research*, 2016, **9**, 332–338.
- 8B. Jarzabek, B. Hajduk, M. Domański, B. Kaczmarczyk, P. Nitschke and H. Bednarski, *High Performance Polymers*, 2018, **30**, 1219–1228.
